1 **METABOLIC RECOVERY AND COMPENSATORY SHELL GROWTH OF JUVENILE**  
2 **PACIFIC GEODUCK *PANOPEA GENEROSA* FOLLOWING SHORT-TERM**  
3 **EXPOSURE TO ACIDIFIED SEAWATER**  
4

5 **Samuel J. Gurr<sup>1\*</sup>, Brent Vadopalas<sup>2</sup>, Steven B. Roberts<sup>3</sup>, Hollie M. Putnam<sup>1</sup>**  
6

7 <sup>1</sup> University of Rhode Island, College of the Environment and Life Sciences, 120 Flagg Rd,  
8 Kingston, RI 02881 USA

9 <sup>2</sup> University of Washington, Washington Sea Grant, 3716 Brooklyn Ave NE, Seattle, WA 98105  
10 USA

11 <sup>3</sup> University of Washington, School of Aquatic and Fishery Sciences, 1122 NE Boat St, Seattle,  
12 WA 98105 USA  
13

14 **\*Corresponding author:** Fax: Phone:1-401-874-9510 Email: samuel\_gurr@uri.edu  
15

16 **Lay summary:** (50-word summary of the paper)

17 Commercial shellfish hatcheries provide essential food security, but often production can be  
18 hampered by sensitivity of shellfish at early life stages. Repeated short-term exposures can  
19 increase tolerance and performance of the geoduck clam with implications for sustainable  
20 aquaculture.  
21  
22  
23  
24  
25  
26  
27  
28  
29

30 **Author contributions:**

31 SJG, BV, SBR, and HMP designed the experiments, SJG conducted the experiments, SJG, BV,  
32 SBR, and HMP drafted, revised, read and approved the final version of the manuscript.  
33  
34  
35  
36  
37  
38  
39  
40  
41  
42  
43  
44

45 **Abstract**

46 While acute stressors can be detrimental, environmental stress conditioning can improve  
47 performance. To test the hypothesis that physiological status is altered by stress conditioning, we  
48 subjected juvenile Pacific geoduck, *Panopea generosa*, to repeated exposures of elevated  $p\text{CO}_2$  in  
49 a commercial hatchery setting followed by a period in ambient common garden. Metabolic rate  
50 and shell length were measured for juvenile geoduck periodically throughout short-term repeated  
51 reciprocal exposure periods in ambient ( $\sim 550 \mu\text{atm}$ ) or elevated ( $\sim 2400 \mu\text{atm}$ )  $p\text{CO}_2$  treatments  
52 and in common, ambient conditions, five months after exposure. Short-term exposure periods  
53 comprised an initial 10-day exposure followed by 14 days in ambient before a secondary 6-day  
54 reciprocal exposure. The initial exposure to elevated  $p\text{CO}_2$  significantly reduced metabolic rate by  
55 25% relative to ambient conditions, but no effect on shell growth was detected. Following 14 days  
56 in common, ambient conditions, reciprocal exposure to elevated or ambient  $p\text{CO}_2$  did not alter  
57 juvenile metabolic rates, indicating ability for metabolic recovery under subsequent conditions.  
58 Shell growth was negatively affected during the reciprocal treatment in both exposure histories,  
59 however clams exposed to the initial elevated  $p\text{CO}_2$  showed compensatory growth with 5.8%  
60 greater shell length (on average between the two secondary exposures) after five months in ambient  
61 conditions. Additionally, clams exposed to the secondary elevated  $p\text{CO}_2$  showed 52.4% increase  
62 in respiration rate after five months in ambient conditions. Early exposure to low pH appears to  
63 trigger carry over effects suggesting bioenergetic re-allocation facilitates growth compensation.  
64 Life stage-specific exposures to stress can determine when it may be especially detrimental, or  
65 advantageous, to apply stress conditioning for commercial production of this long-lived burrowing  
66 clam.

67

## 68 1. Introduction

69 Sustainable food production minimizes overexploitation of wild populations and  
70 degradation of ecological health (Campbell *et al.*, 1998; Shumway *et al.*, 2003; Orensanz *et al.*,  
71 2004; Zhang and Hand, 2006). Shellfish aquaculture has expanded worldwide in recent decades to  
72 satisfy international trade (FAO 2018). However, early larval and juvenile rearing pose a  
73 production bottleneck. For example, early life histories are highly sensitive to biotic (e.g. harmful  
74 algae, pathogens; Prado *et al.*, 2005; Rojas *et al.*, 2015) and abiotic stressors (Kroeker *et al.*, 2010;  
75 Gimenez *et al.*, 2018). These stressors are known to intensify in coastal marine systems (Cloern,  
76 2001; Diaz and Rosenberg, 2001; Cai *et al.*, 2011; Wallace *et al.*, 2014) causing mass mortality  
77 for early-stage bivalves in wild or hatchery settings (Elston *et al.*, 2008; Barton *et al.*, 2015). Local  
78 and global anthropogenic stressors such as CO<sub>2</sub>-induced changes in pH and carbonate mineral  
79 saturation states can reduce performance and normal shell development (White *et al.*, 2013;  
80 Waldbusser *et al.*, 2015; Kapsenberg *et al.*, 2018).

81 Ocean acidification, or the decrease of oceanic pH due to elevated atmospheric partial  
82 pressures ( $\mu\text{atm } p\text{CO}_2$ ), poses a threat to aquaculture (Barton *et al.*, 2012; Froehlich *et al.*, 2018;  
83 Mangi *et al.*, 2018). Elevated  $p\text{CO}_2$  and aragonite undersaturation ( $\Omega_{\text{aragonite}} < 1$ ) generally have  
84 detrimental consequences for aerobic performance (Pörtner *et al.*, 2004; Portner and Farrell, 2008)  
85 and shell biomineralization in marine calcifiers (Shirayama, 2005; Talmage and Gobler, 2010;  
86 Waldbusser *et al.*, 2010, 2015; Gazeau *et al.*, 2013). Responses to acidification can be species  
87 (Ries *et al.*, 2009) and population specific (Lemasson *et al.*, 2018), but it is widely established to  
88 be impactful during early life stages for bivalves (Dupont and Thorndyke, 2009; Gazeau *et al.*,  
89 2010; Kroeker *et al.*, 2010; Gimenez *et al.*, 2018). Experimental research is commonly focused on  
90 species with short generational times, (Parker *et al.*, 2011, 2015; Lohbeck *et al.*, 2012) limiting

91 evidence for effects of acidification on long-lived mollusks important for food and economic  
92 security (Melzner *et al.*, 2009).

93         The Pacific geoduck *Panopea generosa* is a large and long-lived infaunal clam of cultural  
94 and ecological importance (Dethier, 2006) with an increasing presence in sustainable shellfish  
95 industry (Cubillo *et al.*, 2018). Geoduck production in Washington (USA) provides ~90% of  
96 global supply (Shamshak and King, 2015) and alone constitutes 27% of the overall shellfish  
97 revenue in the state valued at >\$24 million yr<sup>-1</sup> and >\$14 pound<sup>-1</sup> as of 2015 (Washington Sea  
98 Grant, 2015). Geoduck are known to live in dynamic CO<sub>2</sub>-enriched low pH waters such as Hood  
99 Canal in Puget Sound, WA where conditions in summer can reach  $\Omega_{\text{aragonite}}$  0.4 and pH 7.4 (Feely  
100 *et al.*, 2010). Although *P. generosa* may be adapted and able to acclimatize to local stressors  
101 (Putnam *et al.*, 2017; Spencer *et al.*, 2018), acidification has caused massive losses of larval  
102 geoduck in hatcheries (Barton *et al.*, 2015), identifying a critical need for assessment of  
103 physiological stress tolerance during early life stages.

104         Evidence of acclimatory mechanisms in response to acidification (Goncalves *et al.*, 2018)  
105 and enhanced performance within and across generations (Parker *et al.*, 2011, 2015; Putnam and  
106 Gates, 2015; Ross *et al.*, 2016; Thomsen *et al.*, 2017; Zhao *et al.*, 2017) support conditioning as a  
107 viable strategy to mitigate the negative effects of stress exposure and enhance organismal  
108 performance under high *p*CO<sub>2</sub> (Parker *et al.*, 2011; Dupont *et al.*, 2012; Suckling *et al.*, 2015; Foo  
109 and Byrne, 2016). Hormesis is a biphasic low-dose-stimulatory response, as identified in  
110 toxicological studies (Calabrese, 2008), and suggests beneficial carryover effects of moderate  
111 stress exposure (Calabrese *et al.*, 2007; Costantini *et al.*, 2010; Costantini, 2014; Putnam *et al.*,  
112 2018). Conditioning-hormesis can explain patterns of inter- and transgenerational plasticity for  
113 organisms under environmental change (Calabrese and Mattson, 2011; Costantini *et al.*, 2012;

114 López-Martínez and Hahn, 2012; Putnam *et al.*, 2018; Visser *et al.*, 2018), but is understudied for  
115 stress resilience in bivalves likely due to generally negative physiological implications of  
116 acidification (Gazeau *et al.*, 2013). In one example of early-life stage conditioning in bivalves,  
117 Putnam *et al.* (2017) found *P. generosa* exhibit compensatory shell growth after an acute exposure  
118 under elevated  $p\text{CO}_2$ . This finding suggests acute exposures may present a strategy for stress-  
119 hardening and enhancement of sustainable geoduck production. We therefore tested the hypothesis  
120 that repeated stress exposure under elevated  $p\text{CO}_2$  can enhance intragenerational performance for  
121 Pacific geoduck. To this end, we measured the standard metabolic rate and shell growth of juvenile  
122 geoduck in a commercial hatchery under repeated acute periods of elevated  $p\text{CO}_2$  and aragonite  
123 undersaturation, and the longer term (~5 months) carry over effects.

124

## 125 **2. Methods**

### 126 **2.1. Exposure of juveniles**

127 Juvenile geoduck ( $n = 640$ ; mean  $\pm$  SEM initial size,  $5.08 \pm 0.66$  mm shell length [measured  
128 parallel to hinge]) were provided by Jamestown Point Whitney Shellfish Hatchery and allocated  
129 into eight trays (Heath/Tecna water tray 10 L;  $n = 80$  clams per tray) for the experiment (Fig. 1).  
130 Trays were filled with 5 mm depth of rinsed sand (35-45  $\mu\text{m}$  grain size) that allowed geoduck to  
131 burrow and siphons could clearly be seen extended above the sediment throughout the  
132 experiments. To enable measurements of metabolic activity and shell growth, 30 geoduck were  
133 placed in an open circular dish (6.5 cm diameter and 3 cm height) with equal mesh size and sand  
134 depth submerged in each tray, the remaining 50 geoduck in each tray burrowed in the surrounding  
135 sediment (Fig. 1). Seawater at the Jamestown Point Whitney Shellfish Hatchery (Brinnon, WA,  
136 USA) was pumped from offshore (100 m) in Quilcene Bay (WA, USA), bag-filtered (5  $\mu\text{m}$ ), and  
137 UV sterilized before fed to 250-L conical tanks at rate of  $1 \text{ L min}^{-1}$ . Four conical tanks were used

138 as replicates for two treatments: elevated  $p\text{CO}_2$  level of ~2000-3000  $\mu\text{atm}$  and ~7.2-7.4 pH (total  
139 scale); and ambient hatchery conditions of ~480-730  $\mu\text{atm}$  and ~7.8-8.0 pH (total scale). The  
140 elevated  $p\text{CO}_2$  level was set with a pH-stat system (Neptune Apex Controller System; Putnam *et*  
141 *al.*, 2016) and gas solenoid valves for a target pH of 7.2. pH (NBS scale) and pH and temperature  
142 ( $^{\circ}\text{C}$ ) were measured every 10 seconds in conicals (Neptune Systems; accuracy:  $\pm 0.01$  pH units  
143 and  $\pm 0.1^{\circ}\text{C}$ , resolution:  $\pm 0.1$  pH units and  $\pm 0.1^{\circ}\text{C}$ ). These treatments were delivered to replicate  
144 exposure trays, which were gravity fed seawater from conicals (Fig. 1;  $n = 4$  per treatment). The  
145 experiment began with an initial exposure period of 10 days under elevated  $p\text{CO}_2$  (2345  $\mu\text{atm}$ ) and  
146 ambient treatments (608  $\mu\text{atm}$ ; Table 1). Preliminary exposure was followed by 14 days in ambient  
147 common garden ( $557 \pm 17 \mu\text{atm}$ ;  $\text{pH}_{\text{t.s.}} 7.9 \pm 0.01$ ;  $\Omega_{\text{aragonite}} 1.46 \pm 0.04$ , mean  $\pm$  SEM) before  
148 secondary exposure for 6 days to reciprocal treatments of elevated  $p\text{CO}_2$  (2552  $\mu\text{atm}$ ) and ambient  
149 treatments (506  $\mu\text{atm}$ ; Table 2). For the secondary exposure period, one tray was crossed to the  
150 opposite treatment to address both repeated and reciprocal exposure ( $n = 2$  trays per  
151 initial $\times$ secondary  $p\text{CO}_2$  treatment; Fig. 1). Following this the juveniles were exposed to ambient  
152 conditions for 157 days within the replicate trays.

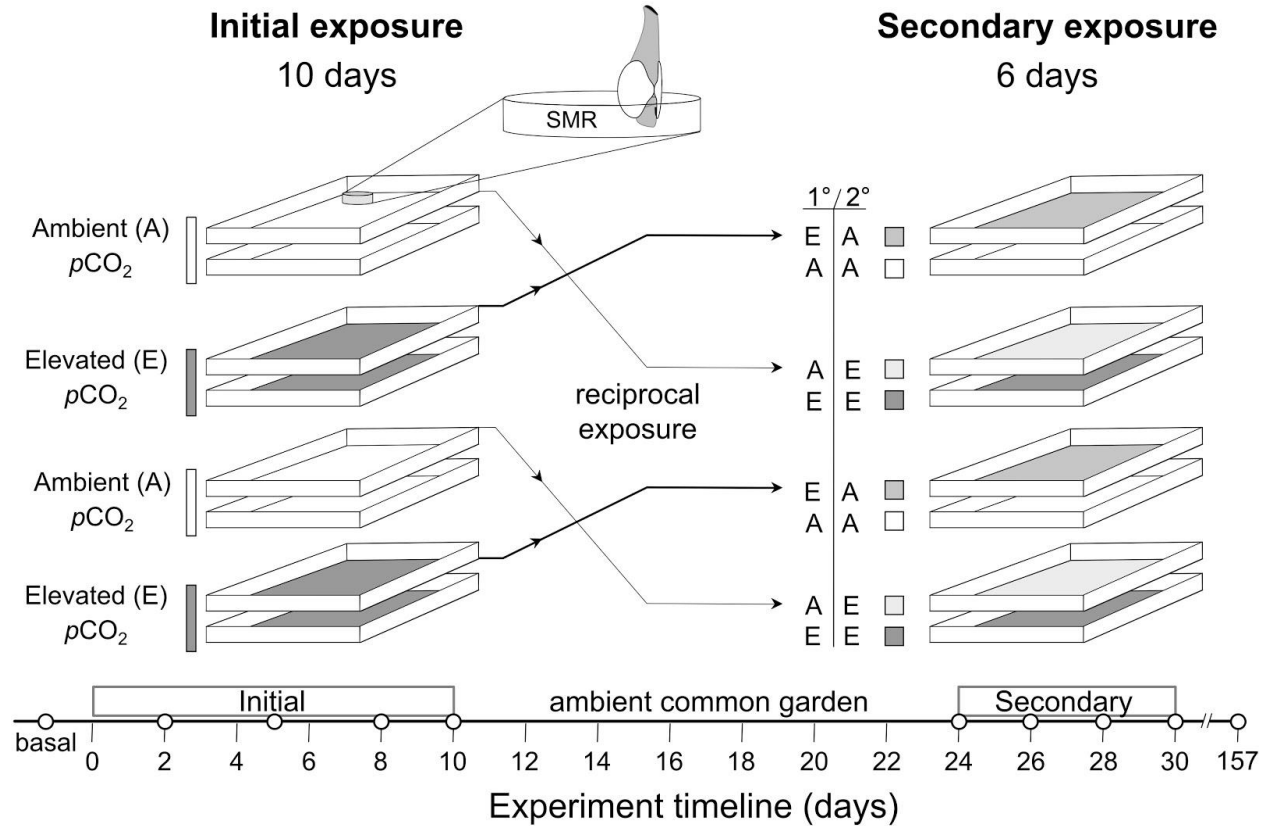

153  
 154 **Figure 1.** Schematic of the repeated exposure experimental design for two exposure trials, initial  
 155 (10-day) and secondary (6-day), in ambient and elevated pCO<sub>2</sub> treatments. Timeline displays  
 156 respiration and growth measurements as solid white circles.

157  
 158 Juvenile geoduck were fed semi-continuously with a mixed algae diet (30% *Isocrysis*  
 159 *galbana*, 30% *Pavlova lutheri*, and 40% *Tetraselmis suecica*) throughout the 30-d experiment with  
 160 a programmable dosing pump (Jebao DP-4 auto dosing pump). Large algae batch cultures were  
 161 counted daily via bright-field image-based analysis (Nexcelom T4 Cellometer; Gurr *et al.*, 2018)  
 162 to calculate a daily ration of  $5 \times 10^7$  live algae cells d<sup>-1</sup> individual<sup>-1</sup>. Diet was calculated with an  
 163 equation in Utting & Spencer (1991) catered for 5-mm clams:  
 164  $V = (S \times 0.4) \div (7 \times W \times C)$ ; this equation accounts for a feed ration of 0.4 mg dried algae mg live  
 165 animal weight<sup>-1</sup> week<sup>-1</sup>, the live animal weight (mg) of spat (S; estimated from regression of shell

166 length and weight of Manilla clams in Utting and Spencer 1991), weight (mg) of one million algal  
167 cells (W), and cell concentration of the culture (cells  $\mu\text{l}^{-1}$ ) to calculate the total volume (V) of each  
168 species in a mixed-algae diet. Tray flow rates (mean flow rate, approx.  $480 \pm 9 \text{ ml}^{-1} \text{ min}^{-1}$ ) and  
169 food delivery were measured and adjusted daily.

170 All geoduck survived the exposure periods. Half of the remaining juveniles burrowed in  
171 each tray were maintained at the hatchery, positioned in the same replicate trays. The juveniles  
172 were fed cultured algae *ad libitum* daily for 157 days before shell length and metabolic rates were  
173 measured.

## 174 **2.2. Respirometry and shell length measurements**

175 Juvenile geoduck were measured on days 2, 5, 8, and 10 of initial exposure, days 0, 2, 4,  
176 and 6 (cumulatively as day 24, 26, 28, and 30, respectively) of secondary exposure, and 157 days  
177 after the exposure period (cumulatively as day 187) to assess rates of oxygen consumption  
178 normalized to shell length. Calibrated optical sensor vials (PreSens, SensorVial SV-PSt5-4ml)  
179 were used to measure oxygen consumption on a 24-well plate sensor system (Presens SDR  
180 SensorDish). Juveniles in each treatment dish were divided into three sensor vials (10 individuals  
181  $\text{vial}^{-1}$  for exposure periods; 1 individual  $\text{vial}^{-1}$  at 157-d post-exposure), each filled with  $0.2 \mu\text{m}$ -  
182 filtered seawater from corresponding trays. Three blank vials per tray, filled only with  $0.2 \mu\text{m}$ -  
183 filtered seawater, were used to account for potential microbial oxygen consumption. Respiratory  
184 runs occurred within an incubator at  $15^\circ\text{C}$ , with the vials and sensor placed on a rotator for mixing.  
185 Each set of measurements lasted ~30 minutes and trials ceased when oxygen concentration  
186 declined to ~70-80% saturation. Geoduck were subsequently photographed and shell length  
187 (parallel to hinge) was measured using Image J with a size standard (1 mm stage micrometer).



188 Rates of respiration (oxygen consumption) were estimated from repeated local linear  
189 regressions using the R package LoLinR (Olito *et al.*, 2017). An initial criterion of fixed constants  
190 (from the LoLin R package) for weighting method ( $L_{\%}$ ) and observations ( $\alpha = 0.2$ ) was run  
191 individually for each respirometry measurement over the full 30-minute record as a “reference”  
192 dataset. These are considered to be the most robust parameters as suggested by the R package  
193 authors (Olito *et al.*, 2017). Diagnostic plots (from the LoLin R package) were individually  
194 observed and  $L_{\%}$  and  $\alpha$  were altered as necessary to best approximate the peak empirical  
195 distribution of local linear regressions (see [https://github.com/SamGurr/Juvenile\\_geoduck\\_OA](https://github.com/SamGurr/Juvenile_geoduck_OA)  
196 “version\_20190620” for full details). To determine the optimal set of parameters, respiration data  
197 was calculated using three  $\alpha$  values and data truncations ( $\alpha = 0.2, 0.4, \text{ and } 0.6$ ; truncation  
198 = 10-20 minutes, 10-25 minutes, and no truncation; weighting method =  $L_{\%}$ ) and each was  
199 compared to the initial reference dataset with two curve fitting steps (local polynomial regressions)  
200 to calculate unbiased and reproducible rates of oxygen consumption similar to the reference (10-  
201 day exposure,  $r^2=0.88$ ; 6-day exposure,  $r^2=0.95$ ). Final metabolic rates of juvenile geoduck were  
202 corrected for vial volume, blank values, and standardized by mean shell length ( $\mu\text{g O}_2 \text{ hr}^{-1} \text{ mm}^{-1}$ ).

### 203 **2.3. Seawater carbonate chemistry**

204 Total alkalinity (TA;  $\mu\text{mol kg}^{-1}$  seawater) water samples were collected from trays and  
205 conicals once daily during treatment periods, in combination with measurements of pH by  
206 handheld probe (Mettler Toledo pH probe; resolution: 1 mV, 0.01 pH ; accuracy:  $\pm 1 \text{ mV}, \pm 0.01$   
207 pH; Thermo Scientific Orion Star A series A325), salinity (Orion 013010MD Conductivity Cell;  
208 range 1  $\mu\text{S/cm} - 200 \text{ mS/cm}$ ; accuracy:  $\pm 0.01 \text{ psu}$ ), and temperature (Fisherbrand Traceable  
209 Platinum Ultra-Accurate Digital Thermometer; resolution;  $0.001^{\circ}\text{C}$ ; accuracy:  $\pm 0.05^{\circ}\text{C}$ ).  
210 Seawater chemistry was measured for three consecutive days during the 14 days of ambient

211 common garden between initial and secondary treatment periods. Quality control for pH data was  
212 assessed daily with Tris standard (Dickson Lab Tris Standard Batch T27) and handheld  
213 conductivity probes used for discrete measurements were calibrated every three days. TA was  
214 measured using an open cell titration (SOP 3b; Dickson *et al.*, 2007) with certified HCl titrant  
215 ( $\sim 0.1 \text{ mol kg}^{-1}$ ,  $\sim 0.6 \text{ mol kg}^{-1}$  NaCl; Dickson Lab) and TA measurements identified  $<1\%$  error  
216 when compared against certified reference materials (Dickson Lab CO<sub>2</sub> CRM Batches 137 and  
217 168). Seawater chemistry was completed following Guide to Best Practices (Dickson *et al.*, 2007);  
218 daily measurements were used to calculate carbonate chemistry, CO<sub>2</sub>,  $p\text{CO}_2$ , HCO<sub>3</sub><sup>3-</sup>, CO<sub>3</sub>, and  
219  $\Omega_{\text{aragonite}}$ , using the SEACARB package (Gattuso *et al.*, 2018) in R v3.5.1 (R Core Team, 2018).

## 220 **2.4. Data Analysis**

221 A two-way Analysis of Variance (ANOVA) was used to analyze the effect of time (fixed),  
222  $p\text{CO}_2$  treatment (fixed), and time $\times p\text{CO}_2$  interaction for respiration and shell length during initial  
223 exposure. A t-test was used to test the effect of initial  $p\text{CO}_2$  treatment on respiration rate and shell  
224 length prior to the secondary exposure (last day of ambient common garden, cumulatively day 24,  
225 day 0). For the secondary exposure period, a three-way ANOVA was used to test the effects of  
226 time (fixed), initial  $p\text{CO}_2$  treatment (fixed), secondary  $p\text{CO}_2$  treatment (fixed), and their  
227 interactions on respiration rate and shell length. Significant model effects were followed with  
228 pairwise comparisons with a Tukey's *a posteriori* HSD. We used a two-way ANOVA to analyze  
229 the effects of initial (fixed) and secondary (fixed)  $p\text{CO}_2$  treatments on respiration and shell length  
230 after 157 days in ambient conditions. In all cases, model residuals were tested for normality  
231 assumptions with visual inspection of diagnostic plots (residual vs. fitted and normal Q-Q; Kozak  
232 and Piepho, 2018) and homogeneity of variance was tested with Levene's test. Model effects using  
233 raw data were robust to transformation(s) that resolved normality assumptions via Shapiro-Wilk

234 test. Statistical tests were completed using R (v3.5.1; [R Core Team, 2018](#)). All code is available  
235 ([https://github.com/SamGurr/Juvenile\\_geoduck\\_OA](https://github.com/SamGurr/Juvenile_geoduck_OA) released as “version\_20190620”) and a doi  
236 will be released upon acceptance for publication.

237

### 238 **3. Results**

#### 239 **3.1. Exposure 1**

240 Elevated  $p\text{CO}_2$  had a significant effect on respiration rate over the initial 10-day exposure  
241 ( $p\text{CO}_2$  treatment,  $F_{1,88} = 7.512$ ;  $P < 0.01$ ) with a 25% reduction (averaged across all days) in  
242 metabolic rate in elevated  $p\text{CO}_2$  treatment relative to ambient (Fig. 2A). Juvenile geoduck grew  
243 significantly with time under the initial 10-d exposure (time,  $F_{3,949} = 3.392$ ;  $P = 0.018$ ) with a 3.6%  
244 increase in shell length between days 2 and 10 (Fig. 2B), but there was no effect of  $p\text{CO}_2$  treatment  
245 on shell length (Table 2). Significant differences in respiration rate from the initial  $p\text{CO}_2$  treatment  
246 were still apparent after 14 days in ambient common garden and before the onset of the secondary  
247 exposure (Table 2 and Fig. 3A). In contrast, there was no significant change in shell length due to  
248 initial  $p\text{CO}_2$  treatment after 14 days in ambient common garden (Table 2).

#### 249 **3.2. Exposure 2**

250 There was no interaction between initial and secondary  $p\text{CO}_2$  treatments nor between  
251 treatments and time on respiration rate or shell length (Table 2). There was a marginal effect of  
252 time on respiration rate (Table 2; time,  $F_{2,60} = 3.137$ ;  $P = 0.0506$ ) with a 31% increase in average  
253 respiration rate between days 2 and 6. Initial  $p\text{CO}_2$  treatment had a significant effect on shell length,  
254 with on average a ~4% reduction in shell size under high  $p\text{CO}_2$  relative to ambient initial exposure  
255 (Fig. 3B;  $p\text{CO}_{2\_initial}$ ,  $F_{1,709} = 15.821$ ;  $P < 0.001$ ). This same trend was present under the secondary  
256 high  $p\text{CO}_2$  exposure, (Fig. 3B;  $p\text{CO}_{2\_secondary}$ ,  $F_{1,709} = 9.917$ ;  $P = 0.002$ ) with 3.20% smaller shells  
257 for individuals exposed to elevated  $p\text{CO}_2$  treatments. There were pairwise differences in shell size

258 between animals only exposed to ambient and animals repeatedly exposed to elevated  $p\text{CO}_2$  (Fig.  
259 3B; day 6,  $P = 0.0415$ ; day 6 ambient - day 4 elevated,  $P = 0.0406$ ).

### 260 **3.3. Common garden after exposure periods**

261 There was no interaction between initial and secondary  $p\text{CO}_2$  treatments on respiration rate  
262 or shell length (Table 2). The initial exposure period had a significant stimulatory effect on shell  
263 length of juveniles previously exposed to high  $p\text{CO}_2$ , after 157 days in ambient common garden  
264 (Fig. 4A;  $p\text{CO}_{2\_initial}$ ,  $F_{1,170} = 5.228$ ;  $P = 0.023$ ), where average shell lengths were 5.8% larger in  
265 juveniles exposed to initial elevated  $p\text{CO}_2$ . Secondary 6-day exposure had a significant effect on  
266 respiration rates after 157 days in ambient common garden (Fig. 4B;  $p\text{CO}_{2\_secondary}$ ,  $F_{1,31} = 13.008$ ;  
267  $P = 0.001$ ) with an average of 52.4% greater respiration rates in juveniles secondarily exposed to  
268 elevated  $p\text{CO}_2$ .

269

## 270 **4. Discussion**

271 Metabolic recovery and compensatory shell growth by juvenile *P. generosa* presents a  
272 novel application of hormetic framework for resilience of a mollusc to acidification. To date,  
273 within-generation carry over effects remain poorly understood for marine molluscs (Ross *et al.*,  
274 2016) with few examples of either positive and negative responses after stress challenges  
275 (Hettinger *et al.*, 2012; Gobler and Talmage, 2013; Putnam *et al.*, 2017). Results of this study  
276 support conditioning-hormesis as a possible driver for physiological acclimation and phenotypic  
277 rescue under environmental change (Costantini, 2019).

### 278 **4.1. Metabolic depression and compensatory response**

279 Metabolic depression, such that was found under initial exposure of geoduck to elevated  
280  $p\text{CO}_2$ , has been suggested as an adaptive mechanism to extend survival (Guppy and Withers,  
281 1999). Stress-induced metabolic depression has been documented for a variety of marine

282 invertebrates in response to environmental stress. For example, in the New Zealand geoduck,  
283 *Panopea zelandica*, there was a 2-fold reduction in respiration rate under abiotic stress (Le *et al.*,  
284 2016). Prior work has shown metabolic reductions up to 60-95% of basal performance at rest for  
285 marine molluscs (Guppy and Withers, 1999). Here, metabolic depression by juvenile geoduck to  
286 ~25% in comparison with metabolic rates under ambient conditions suggests *P. generosa* are  
287 relatively tolerant to short-term acidification and may have adaptive physiology to cope with  
288 environmental acidification and high  $p\text{CO}_2$ . Responsiveness to acidification is critical for pH-  
289 tolerant taxa to maintain buffering capacity and cope with acidosis (high intracellular  $p\text{CO}_2$ ;  
290 (Melzner *et al.*, 2009). However, pH-induced metabolic depression to a similar degree found in  
291 this study has caused a permanent decrease in extracellular pH and increase in protein degradation  
292 and ammonia excretion in the Mediterranean mussel (*Mytilus galloprovincialis*) (Michaelidis *et*  
293 *al.*, 2005). Conversely, metabolic elevation is relatively common for early-life stage bivalves  
294 exposed to low pH and  $\Omega_{\text{aragonite}}$  undersaturation and typically coincides with consequences for  
295 performance and survival (Michaelidis *et al.*, 2005; Beniash *et al.*, 2010; Thomsen and Melzner,  
296 2010; Fernández-Reiriz *et al.*, 2011; Waldbusser *et al.*, 2015; Lemasson *et al.*, 2018). Whether  
297 depressed or elevated, stress-induced metabolic alterations are known to coincide with  
298 biochemical implications (i.e. intracellular hypercapnia and hemolymph acidosis; Pörtner *et al.*,  
299 2004; Spicer *et al.*, 2011), increased ammonia excretion, and reduced growth for invertebrate fauna  
300 (Michaelidis *et al.*, 2005; Beniash *et al.*, 2010; Lannig *et al.*, 2010; Thomsen and Melzner, 2010;  
301 Gazeau *et al.*, 2013).

302 Juvenile geoduck repeatedly exposed to elevated  $p\text{CO}_2$  showed possible stress “memory”  
303 with rebound from metabolic depression under subsequent stress and compensatory shell growth  
304 after long-term recovery. This hormetic-like response (Calabrese *et al.*, 2007; Costantini, 2014)

305 demonstrates a benefit of early stress-priming for later performance and the adaptive plasticity of  
306 *P. generosa* to elevated  $p\text{CO}_2$ . Use of hormesis to conceptualize carry over effects of mild stress  
307 exposure is largely confined to model insects, plants, and microorganisms (Lee *et al.*, 1987;  
308 Calabrese and Blain, 2009; López-Martínez and Hahn, 2012; Visser *et al.*, 2018). For example,  
309 Visser *et al.* (Visser *et al.*, 2018) found the Caribbean fruit fly, *Anastrepha suspensa*, exposed to  
310 oxidative stress early in life enhanced survivorship and investment in fertility and lipid synthesis  
311 under subsequent stress during adulthood. Further mechanistic molecular and biochemical  
312 assessments under different stress intensities (i.e. magnitude, duration, and frequency) are planned  
313 to determine the threshold between low-dose stimulation and high-dose inhibition from stress-  
314 conditioning.

#### 315 **4.2. Age and intensity dependence of shell growth**

316 Metabolic recovery was coupled with reduced shell growth under a repeated stress  
317 encounter (Fig. 3) and compensatory shell growth after approximately five months in ambient  
318 conditions (Fig. 4). This could be explained by several hypotheses such as: carry over effect from  
319 metabolic depression under initial exposure to elevated  $p\text{CO}_2$  (Fig. 2A), differing sensitivity to  
320 stress intensity (Table 1), and/or age dependence for environmental hardening, or the interaction  
321 with increasing temperature through the season (see Supplementary Figure 1.). Bivalves known to  
322 exhibit metabolic suppression under acute and long-term acidification are often attributed with  
323 increased ammonia excretion rates and decreased ingestion and clearance rates as possible  
324 contributors to protein degradation and reduced growth (Michaelidis *et al.*, 2005; Thomsen and  
325 Melzner, 2010; Fernández-Reiriz *et al.*, 2011; Navarro *et al.*, 2013). Therefore, decreased shell  
326 length under secondary exposure may be a carry over effect of metabolic depression during initial  
327 exposure. However, shell length was also reduced for clams initially exposed to the elevated

328 treatment in the second exposure period (Table 2, Fig. 3B) indicating potential age-dependence on  
329 calcification and bioenergetic effects for juvenile *P. generosa*. This reduction however, could be  
330 explained by the fact the secondary elevated  $p\text{CO}_2$  treatment was on average  $\sim 0.04$  pH units lower  
331 than the initial exposure (Table 1) suggesting possible sensitivity to increased stress intensity. It is  
332 likely that both temporal dynamics and stress thresholds influence intragenerational carry over  
333 effects and further experimental efforts with repeated reciprocal design are needed.

334         Respiration rates and shell growth five months post-exposure show a latent enhancement  
335 for animals repeatedly stressed or exposed to a stress event earlier in life, emphasizing the  
336 importance of the severity, duration, and timing of intragenerational stress-conditioning. These  
337 specific findings present a window in their life history where it may be advantageous to condition  
338 Pacific geoduck for enhancement of sustainable aquaculture.

339         A growing body of literature describes the importance of designing environmentally  
340 relevant stressor regimes to assess the physiology and survival of early-stage and adult  
341 invertebrates (Suckling *et al.*, 2015; Cole *et al.*, 2016; Parker *et al.*, 2017; Scanes *et al.*, 2017;  
342 Lemasson *et al.*, 2018). Fewer studies have, however, tested responses of benthic infauna to  
343 realistic environmental regimes found within an organism's natural habitat (Green *et al.*, 2009;  
344 Thomsen *et al.*, 2017; García *et al.*, 2018). Such experiments have shown coupled effects of  
345 acidification alongside pathogens, food availability, and environmental chemistry (Sanders *et al.*,  
346 2013; Thomsen *et al.*, 2013; Cao *et al.*, 2018; Stevens and Gobler, 2018). For example, Mackenzie  
347 *et al.* (2014) found temperature outweighed the effects of elevated  $p\text{CO}_2$  for decreased shell growth  
348 of the adult blue mussel *Mytilus edulis*. Averaged temperatures in the present study increased  $\sim 1.5$ -  
349  $2^\circ\text{C}$  between initial and secondary exposures (Table 1), therefore decreased shell length during  
350 secondary exposure to elevated  $p\text{CO}_2$  (Fig. 3B) could have been driven additively by temperature.

351 Further investigations of *P. generosa* must address coupled stressors of varied frequency and  
352 duration to determine the detrimental, advantageous, or neutral impacts and interactions of  
353 multiple stressors (Gunderson *et al.*, 2016).

#### 354 **4.3. Environmental applications of experimental findings**

355 Although this study was primarily focused on production enhancement in a hatchery  
356 setting, effects on shell growth and metabolic activity have important applications to natural  
357 systems. Seawater carbonate chemistry targeted for stress treatments was more severe than levels  
358 commonly used in experimental research (Gazeau *et al.*, 2010; Navarro *et al.*, 2013; Diaz *et al.*,  
359 2018), but relevant to summer subsurface conditions within the natural range of *P. generosa* (pH  
360 7.41;  $\Omega_{\text{aragonite}}$  0.42 in Hood Canal, WA; Feely *et al.*, 2010). Thus, survival, metabolic recovery,  
361 and compensatory growth in *P. generosa* in this study demonstrates a resilience to short-term  
362 acidification in the water column. Enhanced growth rates during juvenile development can present  
363 benefits for burrowing behavior (Green *et al.*, 2009; Clements *et al.*, 2016; Meseck *et al.*, 2018)  
364 and survival due to decreased risk of predation and susceptibility to environmental stress  
365 (Przeslawski and Webb, 2009; Johnson and Smee, 2012). Specific to juvenile *P. generosa*, time to  
366 metamorphosis (to dissoconch), pre-burrowing time (time elapsed to anchor into substrate and  
367 obtain upright position), and burrowing depth are directly related to growth and survival (Goodwin  
368 and Pease, 1989; Tapia-Morales *et al.*, 2015). Thus, stress conditioning under CO<sub>2</sub>-enrichment and  
369 low pH may enhance survivorship of juvenile geoduck in natural systems. Water column carbonate  
370 chemistry may be critical for sustainable production of infaunal clams, such as *P. generosa*, that  
371 are outplanted for several years *in-situ* on mudflats known to exhibit dynamic abiotic gradients  
372 (Green *et al.*, 1993; Burdige *et al.*, 2008; Feely *et al.*, 2010) adjacent to seasonally acidified and  
373 undersaturated water bodies (Feely *et al.*, 2010; Reum *et al.*, 2014).



374

## 375 **Conclusion**

376 Data in this present study provides evidence of capacity to cope with short-term  
377 acidification for an understudied infaunal clam of high economic importance. Survival of all  
378 individuals over the 30-d experiment demonstrates the resilience of this species to low pH and  
379 reduced carbonate saturation. Juvenile geoduck exposed to low pH for 10 days recovered from  
380 metabolic depression under subsequent stress exposure and conditioned animals showed a  
381 significant increase in both shell length and metabolic rate compared to controls after five months  
382 under ambient conditions, suggesting stress “memory” and compensatory growth as possible  
383 indicators of enhanced performance from intragenerational stress-conditioning. Our focus on  
384 industry enhancement must expand to test developmental morphology, physiology, and genetic  
385 and non-genetic markers over larval and juvenile stages in a multi-generational experiment to  
386 generate a more holistic assessment of stress hardening and the effects of exposure on cellular  
387 stress response (Costantini *et al.*, 2010; Foo and Byrne, 2016; Eirin-Lopez and Putnam, 2018) for  
388 advancement of sustainable aquaculture (Branch *et al.*, 2013). Parental conditioning for the benefit  
389 of production (Utting and Millican, 1997) has merit for economically important bivalves (Parker  
390 *et al.*, 2012; 2013; 2015). Advancements in genome sequencing demands further research to  
391 synthesize -omic profiling (i.e global DNA methylation and differential expression) with  
392 physiological responses throughout reproductive and offspring development under environmental  
393 stress (Gavery and Roberts, 2014; Li *et al.*, 2019) to determine if these mechanisms are transferable  
394 among species. Stress conditioning within a generation at critical life stages may yield beneficial  
395 responses for food production and provide a baseline for other long-lived burrowing bivalves of  
396 ecological and economic importance.

397

398 **Supplementary Material:**

399 Supplementary Figure 1. Continuous temp and pH data from APEX system

400

401 **Funding:**

402 This work was funded in part through a grant from the Foundation for Food and Agriculture  
403 research; Development of Environmental Conditioning Practices to Decrease Impacts of Climate  
404 Change on Shellfish Aquaculture.

405

406 **Acknowledgements:**

407 We thank the Jamestown S’Klallam Tribe and Kurt Grinnell for providing the animals and  
408 facilities for this research. We also thank the management staff and technicians at the Jamestown  
409 Point Whitney Shellfish Hatchery, Matt Henderson, Josh Valley, and Clara Duncan, for their  
410 assistance, and Maddie Sherman, Emma Strand, and Kaitlyn Mitchell for analytical support.

411

412

413

414

415

416

417

418

419

420

421

422

423

424 **References:**

- 425 Barton A, Hales B, Waldbusser GG, Langdon C, Feely RA (2012) The Pacific oyster, *Crassostrea*  
426 *gigas*, shows negative correlation to naturally elevated carbon dioxide levels: Implications for  
427 near-term ocean acidification effects. *Limnol Oceanogr* 57: 698–710.
- 428 Barton A, Hatchery WCS, Waldbusser G, Feely R, Weisberg S, Newton J, Hales B, Cudd S, Eudeline  
429 B, Langdon C, *et al.* (2015) Impacts of coastal acidification on the Pacific Northwest shellfish  
430 industry and adaptation strategies implemented in response. *Oceanography* 25: 146–159.
- 431 Beniash E, Ivanina A, Lieb NS, Kurochkin I, Sokolova IM (2010) Elevated level of carbon dioxide  
432 affects metabolism and shell formation in oysters *Crassostrea virginica* (Gmelin). *Mar Ecol Prog*  
433 *Ser* 419: 95–108.
- 434 Branch TA, DeJoseph BM, Ray LJ, Wagner CA (2013) Impacts of ocean acidification on marine  
435 seafood. *Trends Ecol Evol* 28: 178–186.
- 436 Burdige DJ, Zimmerman RC, Hu X (2008) Rates of carbonate dissolution in permeable sediments  
437 estimated from pore-water profiles: The role of sea grasses. *Limnol Oceanogr* 53: 549–565.
- 438 Cai W-J, Hu X, Huang W-J, Murrell MC, Lehrter JC, Lohrenz SE, Chou W-C, Zhai W, Hollibaugh  
439 JT, Wang Y, *et al.* (2011) Acidification of subsurface coastal waters enhanced by eutrophication.  
440 *Nat Geosci* 4: 766–770.
- 441 Calabrese EJ (2008) Hormesis: why it is important to toxicology and toxicologists. *Environ Toxicol*  
442 *Chem* 27: 1451–1474.
- 443 Calabrese EJ, Bachmann KA, Bailer AJ, Bolger PM, Borak J, Cai L, Cedergreen N, Cherian MG,  
444 Chiueh CC, Clarkson TW, *et al.* (2007) Biological stress response terminology: Integrating the  
445 concepts of adaptive response and preconditioning stress within a hormetic dose-response  
446 framework. *Toxicol Appl Pharmacol* 222: 122–128.
- 447 Calabrese EJ, Blain RB (2009) Hormesis and plant biology. *Environmental Pollution*.
- 448 Calabrese EJ, Mattson MP (2011) Hormesis provides a generalized quantitative estimate of biological  
449 plasticity. *J Cell Commun Signal* 5: 25–38.
- 450 Campbell A, Harbo RM, Hand CM (1998) Harvesting and distribution of Pacific geoduck clams,  
451 *Panopea abrupta*, in British Columbia. *Can Spec Publ Fish Aquat Sci/Publ Spec Can Sci Halieut*  
452 *Aquat* 125: 349–358.

- 456 Cao R, Liu Y, Wang Q, Yang D, Liu H, Ran W, Qu Y, Zhao J (2018) Seawater acidification reduced  
454 the resistance of *Crassostrea gigas* to *Vibrio splendidus* challenge: an energy metabolism  
455 perspective. *Frontiers in Physiology*.
- 456 Clements JC, Woodard KD, Hunt HL (2016) Porewater acidification alters the burrowing behavior  
457 and post-settlement dispersal of juvenile soft-shell clams (*Mya arenaria*). *J Exp Mar Bio Ecol*  
458 477: 103–111.
- 459 Cloern JE (2001) Our evolving conceptual model of the coastal eutrophication problem. *Marine*  
460 *Ecology Progress Series*.
- 461 Cole VJ, Parker LM, O'Connor SJ, O'Connor WA, Scanes E, Byrne M, Ross PM (2016) Effects of  
462 multiple climate change stressors: ocean acidification interacts with warming, hyposalinity, and  
463 low food supply on the larvae of the brooding flat oyster *Ostrea angasi*. *Mar Biol* 163.  
464 doi:10.1007/s00227-016-2880-4
- 465 Costantini D (2014) Does hormesis foster organism resistance to extreme events? *Frontiers in*  
466 *Ecology and the Environment*.
- 467 Costantini D (2019) Hormesis promotes evolutionary change. *Dose Response* 17: 1–4.
- 468 Costantini D, Metcalfe NB, Monaghan P (2010) Ecological processes in a hormetic framework. *Ecol*  
469 *Lett* 13: 1435–1447.
- 470 Costantini D, Monaghan P, Metcalfe NB (2012) Early life experience primes resistance to oxidative  
471 stress. *J Exp Biol* 215: 2820–2826.
- 472 Cubillo AM, Ferreira JG, Pearce CM, Marshall R, Cheney D, Hudson B (2018) Ecosystem services of  
473 geoduck farming in South Puget Sound, USA: a modeling analysis. *Aquac Int* 26: 1427–1443.
- 474 Dethier M (2006) Native Shellfish in Nearshore Ecosystems of Puget Sound. Puget Sound Nearshore  
475 Partnership Report No. 2006-04. Seattle District, U.S. Army Corps of Engineers, Seattle,  
476 Washington.
- 477 Diaz RJ, Rosenberg R (2001) Overview of anthropogenically-induced hypoxic effects on marine  
478 benthic fauna. *Coastal and Estuarine Studies*.
- 479 Diaz R, Lardies MA, Tapia FJ, Tarifeño E, Vargas CA (2018) Transgenerational effects of pCO<sub>2</sub>-  
480 driven ocean acidification on adult mussels *Mytilus chilensis* modulate physiological response to  
481 multiple stressors in larvae. *Front Physiol* 9. doi:10.3389/fphys.2018.01349
- 482 Dickson AG, Sabine CL, Christian JR, eds. (2007) Guide to Best Practices for Ocean CO<sub>2</sub>  
483 Measurements. PICES.

- 48 Dupont S, Dorey N, Stumpp M, Melzner F, Thorndyke M (2012) Long-term and trans-life-cycle  
485 effects of exposure to ocean acidification in the green sea urchin *Strongylocentrotus*  
486 *droebachiensis*. *Mar Biol* 160: 1835–1843.
- 48 Dupont S, Thorndyke MC (2009) Impact of CO<sub>2</sub>-driven ocean acidification on invertebrates early  
488 life-history – What we know, what we need to know and what we can do. *Biogeosciences*  
489 *Discussions*.
- 49 Eirin-Lopez JM, Putnam HM (2018) Marine environmental epigenetics. *Ann Rev Mar Sci*.  
491 doi:10.1146/annurev-marine-010318-095114
- 49 Elston RA, Hasegawa H, Humphrey KL, Polyak IK, Häse CC (2008) Re-emergence of *Vibrio*  
493 *tubiaschii* in bivalve shellfish aquaculture: severity, environmental drivers, geographic extent and  
494 management. *Dis Aquat Organ* 82: 119–134.
- 49 FAO (2018) The State of World Fisheries and Aquaculture 2018 - Meeting the Sustainable  
496 Development Goals.
- 49 Feely RA, Alin SR, Newton J, Sabine CL, Warner M, Devol A, Krembs C, Maloy C (2010) The  
498 combined effects of ocean acidification, mixing, and respiration on pH and carbonate saturation  
499 in an urbanized estuary. *Estuar Coast Shelf Sci* 88: 442–449.
- 50 Fernández-Reiriz MJ, Range P, Álvarez-Salgado XA, Labarta U (2011) Physiological energetics of  
501 juvenile clams *Ruditapes decussatus* in a high CO<sub>2</sub> coastal ocean. *Mar Ecol Prog Ser* 433: 97–  
502 105.
- 50 Foo SA, Byrne M (2016) Acclimatization and adaptive capacity of marine species in a changing  
504 ocean. In: *Advances in Marine Biology*. pp 69–116.
- 50 Froehlich HE, Gentry RR, Halpern BS (2018) Global change in marine aquaculture production  
506 potential under climate change. *Nat Ecol Evol* 2: 1745–1750.
- 50 García E, Clemente S, Hernández JC (2018) Effects of natural current pH variability on the sea urchin  
508 *Paracentrotus lividus* larvae development and settlement. *Mar Environ Res* 139: 11–18.
- 50 Gattuso JP, Epitalon JM, Lavigne H (2018) Seacarb: Seawater Carbonate Chemistry.
- 51 Gavery MR, Roberts SB (2014) A context dependent role for DNA methylation in bivalves. *Brief*  
511 *Funct Genomics* 13: 217–222.
- 51 Gazeau F, Gattuso JP, Dawber C, Pronker AE, Peene F, Peene J, Heip CHR, Middelburg JJ (2010)  
513 Effect of ocean acidification on the early life stages of the blue mussel (*Mytilus edulis*).  
514 *Biogeosci Discuss* 7: 2927–2947.

- 516 Gazeau F, Parker LM, Comeau S, Gattuso J-P, O'Connor WA, Martin S, Pörtner H-O, Ross PM  
516 (2013) Impacts of ocean acidification on marine shelled molluscs. *Mar Biol* 160: 2207–2245.
- 517 Gimenez I, Waldbusser GG, Hales B (2018) Ocean acidification stress index for shellfish (OASIS):  
518 Linking Pacific oyster larval survival and exposure to variable carbonate chemistry regimes.  
519 *Elem Sci Anth* 6: 51.
- 520 Goble CJ, Talmage SC (2013) Short- and long-term consequences of larval stage exposure to  
521 constantly and ephemerally elevated carbon dioxide for marine bivalve populations.  
522 *Biogeosciences*.
- 523 Goncalves P, Anderson K, Raftos DA, Thompson EL (2018) The capacity of oysters to regulate  
524 energy metabolism-related processes may be key to their resilience against ocean acidification.  
525 *Aquac Res* 49: 2059–2071.
- 526 Goodwin L, Pease B (1989) Species Profiles: Life Histories and Environmental Requirements of  
527 Coastal Fish and Invertebrates (Pacific Northwest): Pacific Geoduck Clam. US Fish and  
528 Wildlife.
- 529 Green MA, Aller RC, Aller JY (1993) Carbonate dissolution and temporal abundances of  
530 Foraminifera in Long Island Sound sediments. *Limnol Oceanogr* 38: 331–345.
- 531 Green MA, Waldbusser GG, Reilly SL, Emerson K, O'Donnell S (2009) Death by dissolution:  
532 Sediment saturation state as a mortality factor for juvenile bivalves. *Limnol Oceanogr* 54: 1037–  
533 1047.
- 534 Gunderson AR, Armstrong EJ, Stillman JH (2016) Multiple stressors in a changing world: the need  
535 for an improved perspective on physiological responses to the dynamic marine environment. *Ann*  
536 *Rev Mar Sci* 8: 357–378.
- 537 Guppy M, Withers P (1999) Metabolic depression in animals: physiological perspectives and  
538 biochemical generalizations. *Biol Rev Camb Philos Soc* 74: 1–40.
- 539 Gurr SJ, Rollando C, Chan LL, Vadopalas B, Putnam HM, Roberts SB (2018) Alternative Image-  
540 Based Technique for Phytoplankton Cell Counts in Shellfish Aquaculture ( No. 1001481).  
541 Nexcelom.
- 542 Hettinger A, Sanford E, Hill TM, Russell AD, Sato KNS, Hoey J, Forsch M, Page HN, Gaylord B  
543 (2012) Persistent carry-over effects of planktonic exposure to ocean acidification in the Olympia  
544 oyster. *Ecology* 93: 2758–2768.

- 545 Johnson KD, Smee DL (2012) Size matters for risk assessment and resource allocation in bivalves.  
546 *Marine Ecology Progress Series*.
- 547 Kapsenberg L, Miglioli A, Bitter MC, Tambutté E, Dumollard R, Gattuso JP (2018) Ocean pH  
548 fluctuations affect mussel larvae at key developmental transitions. *Proceedings of the Royal*  
549 *Society B: Biological Sciences* 285: 20182381.
- 550 Kozak M, Piepho HP (2018) What's normal anyway? Residual plots are more telling than  
551 significance tests when checking ANOVA assumptions. *Journal of Agronomy and Crop Science*.
- 552 Kroeker KJ, Kordas RL, Crim RN, Singh GG (2010) Meta-analysis reveals negative yet variable  
553 effects of ocean acidification on marine organisms. *Ecol Lett* 13: 1419–1434.
- 554 Lannig G, Eilers S, Pörtner HO, Sokolova IM, Bock C (2010) Impact of ocean acidification on energy  
555 metabolism of oyster, *Crassostrea gigas*—changes in metabolic pathways and thermal response.  
556 *Marine Drugs*.
- 557 Le DV, Alfaro AC, Ragg NLC, Hilton Z, King N (2016) Aerobic scope and oxygen regulation of  
558 New Zealand geoduck (*Panopea zelandica*) in response to progressive hypoxia. *Aquaculture* 463:  
559 28–36.
- 560 Lee RE Jr, Chen CP, Denlinger DL (1987) A rapid cold-hardening process in insects. *Science* 238:  
561 1415–1417.
- 562 Lemasson AJ, Hall-Spencer JM, Fletcher S, Provstgaard-Morys S, Knights AM (2018) Indications of  
563 future performance of native and non-native adult oysters under acidification and warming. *Mar*  
564 *Environ Res* 142: 178–189.
- 565 Li Y, Zhang L, Li Y, Li W, Guo Z, Li R, Hu X, Bao Z, Wang S (2019) Dynamics of DNA  
566 methylation and DNMT expression during gametogenesis and early development of scallop  
567 *Patinopecten yessoensis*. *Mar Biotechnol*. doi:10.1007/s10126-018-09871-w
- 568 Rohbeck KT, Riebesell U, Reusch TBH (2012) Adaptive evolution of a key phytoplankton species to  
569 ocean acidification. *Nat Geosci* 5: 346–351.
- 570 López-Martínez G, Hahn DA (2012) Short-term anoxic conditioning hormesis boosts antioxidant  
571 defenses, lowers oxidative damage following irradiation and enhances male sexual performance  
572 in the Caribbean fruit fly, *Anastrepha suspensa*. *J Exp Biol* 215: 2150–2161.
- 573 Mackenzie CL, Ormondroyd GA, Curling SF, Ball RJ, Whiteley NM, Malham SK (2014) Ocean  
574 warming, more than acidification, reduces shell strength in a commercial shellfish species during  
575 food limitation. *PLoS ONE*.

- 57Mangi SC, Lee J, Pinnegar JK, Law RJ, Tyllianakis E, Birchenough SNR (2018) The economic  
577 impacts of ocean acidification on shellfish fisheries and aquaculture in the United Kingdom.  
578 *Environ Sci Policy* 86: 95–105.
- 57Melzner F, Gutowska MA, Langenbuch M, Dupont S, Lucassen M, Thorndyke MC, Bleich M,  
580 Pörtner HO (2009) Physiological basis for high CO<sub>2</sub> tolerance in marine ectothermic animals:  
581 pre-adaptation through lifestyle and ontogeny? *Biogeosci Discuss* 6: 4693–4738.
- 58Meseck SL, Mercaldo-Allen R, Kuropat C, Clark P, Goldberg R (2018) Variability in sediment-water  
583 carbonate chemistry and bivalve abundance after bivalve settlement in Long Island Sound,  
584 Milford, Connecticut. *Mar Pollut Bull* 135: 165–175.
- 58Michaelidis B, Ouzounis C, Palaras A, Pörtner HO (2005) Effects of long-term moderate hypercapnia  
586 on acid-base balance and growth rate in marine mussels *Mytilus galloprovincialis*. *Mar Ecol*  
587 *Prog Ser* 293: 109–118.
- 58Navarro JM, Torres R, Acuña K, Duarte C, Manriquez PH, Lardies M, Lagos NA, Vargas C, Aguilera  
589 V (2013) Impact of medium-term exposure to elevated pCO<sub>2</sub> levels on the physiological  
590 energetics of the mussel *Mytilus chilensis*. *Chemosphere* 90: 1242–1248.
- 59Olito C, White CR, Marshall DJ, Barneche DR (2017) Estimating monotonic rates from biological  
592 data using local linear regression. *J Exp Biol* 220: 759–764.
- 59Orensanz JM (lobo), Hand CM, Parma AM, Valero J, Hilborn R (2004) Precaution in the harvest of  
594 Methuselah’s clams the difficulty of getting timely feedback from slow-paced dynamics. *Can J*  
595 *Fish Aquat Sci* 61: 1355–1372.
- 59Barker LM, O’Connor WA, Byrne M, Coleman RA, Virtue P, Dove M, Gibbs M, Spohr L, Scanes E,  
597 Ross PM (2017) Adult exposure to ocean acidification is maladaptive for larvae of the Sydney  
598 rock oyster in the presence of multiple stressors. *Biol Lett* 13. doi:10.1098/rsbl.2016.0798
- 59Barker LM, O’Connor WA, Raftos DA, Pörtner H-O, Ross PM (2015) Persistence of positive  
600 carryover effects in the oyster, *Saccostrea glomerata*, following transgenerational exposure to  
601 ocean acidification. *PLoS One* 10: e0132276.
- 60Barker LM, Ross PM, O’Connor WA, Borysko L, Raftos DA, Pörtner H-O (2011) Adult exposure  
603 influences offspring response to ocean acidification in oysters. *Glob Chang Biol* 18: 82–92.
- 60Pörtner HO, Farrell AP (2008) Physiology and climate change. *Science* 322: 690–692.
- 60Pörtner HO, Langenbuch M, Reipschläger A (2004) Biological impact of elevated ocean CO<sub>2</sub>  
606 concentrations: lessons from animal physiology and earth history. *J Oceanogr* 60: 705–718.



- 60 Prado S, Romalde JL, Montes J, Barja JL (2005) Pathogenic bacteria isolated from disease outbreaks  
608 in shellfish hatcheries. First description of *Vibrio neptunius* as an oyster pathogen. *Dis Aquat*  
609 *Organ* 67: 209–215.
- 61 Przeslawski R, Webb AR (2009) Natural variation in larval size and developmental rate of the  
611 northern quahog *Mercenaria mercenaria* and associated effects on larval and juvenile fitness.  
612 *Journal of Shellfish Research*.
- 61 Putnam HM, Davidson JM, Gates RD (2016) Ocean acidification influences host DNA methylation  
614 and phenotypic plasticity in environmentally susceptible corals. *Evol Appl* 9: 1165–1178.
- 61 Putnam HM, Gates RD (2015) Preconditioning in the reef-building coral *Pocillopora damicornis* and  
616 the potential for trans-generational acclimatization in coral larvae under future climate change  
617 conditions. *J Exp Biol* 218: 2365–2372.
- 61 Putnam HM, Ritson-Williams R, Cruz JA, Davidson JM, Gates RD (2018) Nurtured by nature:  
619 considering the role of environmental and parental legacies in coral ecological performance.  
620 *bioRxiv*. doi:10.1101/317453
- 62 Putnam H, Roberts S, Spencer LH (2017) Capacity or adaptation and acclimatization to ocean  
622 acidification in geoduck through epigenetic mechanisms.
- 62 R Core Team (2018) A Language and Environment for Statistical Computing.
- 62 Reum JCP, Alin SR, Feely RA, Newton J, Warner M, McElhany P (2014) Seasonal carbonate  
625 chemistry covariation with temperature, oxygen, and salinity in a fjord estuary: implications for  
626 the design of ocean acidification experiments. *PLoS One* 9: e89619.
- 62 Ries JB, Cohen AL, McCorkle DC (2009) Marine calcifiers exhibit mixed responses to CO<sub>2</sub>-induced  
628 ocean acidification. *Geology* 37: 1131–1134.
- 62 Rojas R, Miranda CD, Opazo R, Romero J (2015) Characterization and pathogenicity of *Vibrio*  
630 *splendidus* strains associated with massive mortalities of commercial hatchery-reared larvae of  
631 scallop *Argopecten purpuratus* (Lamarck, 1819). *J Invertebr Pathol* 124: 61–69.
- 63 Ross PM, Parker L, Byrne M (2016) Transgenerational responses of molluscs and echinoderms to  
633 changing ocean conditions. *ICES Journal of Marine Science: Journal du Conseil*.
- 63 Sanders MB, Bean TP, Hutchinson TH, Le Quesne WJF (2013) Juvenile king scallop, *Pecten*  
635 *maximus*, is potentially tolerant to low levels of ocean acidification when food is unrestricted.  
636 *PLoS One* 8: e74118.

- 638 Scanes E, Parker LM, O'Connor WA, Stapp LS, Ross PM (2017) Intertidal oysters reach their  
639 physiological limit in a future high-CO<sub>2</sub> world. *J Exp Biol* 220: 765–774.
- 640 Shamsak GL, King JR (2015) From cannery to culinary luxury: the evolution of the global geoduck  
641 market. *Mar Policy* 55: 81–89.
- 642 Hirayama Y (2005) Effect of increased atmospheric CO<sub>2</sub> on shallow water marine benthos. *J*  
643 *Geophys Res* 110. doi:10.1029/2004jc002618
- 644 Shumway SE, Davis C, Downey R, Karney R, Kraeuter J, Parsons J, Rheault R, Wikfors G (2003)  
645 Shellfish aquaculture—in praise of sustainable economies and environments. *World Aquacult* 34:  
646 8–10.
- 647 Spencer LH, Horwith M, Lowe AT, Venkataraman YR, Timmins-Schiffman E, Nunn BL, Roberts SB  
648 (2018) Pacific geoduck (*Panopea generosa*) resilience to natural pH variation.
- 649 Spicer JJ, Widdicombe S, Needham HR, Berge JA (2011) Impact of CO<sub>2</sub>-acidified seawater on the  
650 extracellular acid–base balance of the northern sea urchin *Strongylocentrotus dröebachiensis*.  
651 *Journal of Experimental Marine Biology and Ecology*.
- 652 Stevens AM, Gobler CJ (2018) Interactive effects of acidification, hypoxia, and thermal stress on  
653 growth, respiration, and survival of four North Atlantic bivalves. *Mar Ecol Prog Ser* 604: 143–  
654 161.
- 655 Suckling CC, Clark MS, Richard J, Morley SA, Thorne MAS, Harper EM, Peck LS (2015) Adult  
656 acclimation to combined temperature and pH stressors significantly enhances reproductive  
657 outcomes compared to short-term exposures. *J Anim Ecol* 84: 773–784.
- 658 Talmage SC, Gobler CJ (2010) Effects of past, present, and future ocean carbon dioxide  
659 concentrations on the growth and survival of larval shellfish. *Proc Natl Acad Sci U S A* 107:  
660 17246–17251.
- 661 Tapia-Morales S, García-Esquivel Z, Vadopalas B, Davis J (2015) Growth and burrowing rates of  
662 juvenile geoducks *Panopea generosa* and *Panopea globosa* under laboratory conditions. *Journal*  
663 *of Shellfish Research*.
- 664 Thomsen J, Casties I, Pansch C, Körtzinger A, Melzner F (2013) Food availability outweighs ocean  
665 acidification effects in juvenile *Mytilus edulis*: laboratory and field experiments. *Glob Chang*  
666 *Biol* 19: 1017–1027.
- 667 Thomsen J, Melzner F (2010) Moderate seawater acidification does not elicit long-term metabolic  
668 depression in the blue mussel *Mytilus edulis*. *Mar Biol* 157: 2667–2676.

- 668 Thomsen J, Stapp LS, Haynert K, Schade H, Danelli M, Lannig G, Mathias Wegner K, Melzner F  
669 (2017) Naturally acidified habitat selects for ocean acidification-tolerant mussels. *Science*  
670 *Advances* 3: e1602411.
- 671 Utting SD, Millican PF (1997) Techniques for the hatchery conditioning of bivalve broodstocks and  
672 the subsequent effect on egg quality and larval viability. *Aquaculture* 155: 45–54.
- 673 Visser B, Williams CM, Hahn DA, Short CA, López-Martínez G (2018) Hormetic benefits of prior  
674 anoxia exposure in buffering anoxia stress in a soil-pupating insect. *The Journal of Experimental*  
675 *Biology*.
- 676 Waldbusser GG, Hales B, Langdon CJ, Haley BA, Schrader P, Brunner EL, Gray MW, Miller CA,  
677 Gimenez I, Hutchinson G (2015) Ocean acidification has multiple modes of action on bivalve  
678 larvae. *PLoS One* 10: e0128376.
- 679 Waldbusser GG, Voigt EP, Bergschneider H, Green MA, Newell RIE (2010) Biocalcification in the  
680 eastern oyster (*Crassostrea virginica*) in relation to long-term trends in Chesapeake Bay pH.  
681 *Estuaries Coasts* 34: 221–231.
- 682 Wallace RB, Baumann H, Grear JS, Aller RC, Gobler CJ (2014) Coastal ocean acidification: The  
683 other eutrophication problem. *Estuarine, Coastal and Shelf Science*.
- 684 Washington Sea Grant (2015) Shellfish Aquaculture in Washington State. Final report to the  
685 Washington State Legislature. Washington Sea Grant.
- 686 White MM, McCorkle DC, Mullineaux LS, Cohen AL (2013) Early exposure of bay scallops  
687 (*Argopecten irradians*) to high CO<sub>2</sub> causes a decrease in larval shell growth. *PLoS One* 8:  
688 e61065.
- 689 Zhang Z, Hand C (2006) Recruitment patterns and precautionary exploitation rates for geoduck  
690 (*Panopea abrupta*) populations in British Columbia. *J Shellfish Res* 25: 445–453.
- 691 Zhao L, Schöne BR, Mertz-Kraus R, Yang F (2017) Sodium provides unique insights into  
692 transgenerational effects of ocean acidification on bivalve shell formation. *Sci Total Environ*  
693 577: 360–366.

| Initial exposure   |              |              |                     |              |                       |                          |                       |                       |                       |                       |                      |
|--------------------|--------------|--------------|---------------------|--------------|-----------------------|--------------------------|-----------------------|-----------------------|-----------------------|-----------------------|----------------------|
|                    |              |              | Flow rate           | pH, Total    | CO <sub>2</sub>       | <i>p</i> CO <sub>2</sub> | HCO <sub>3</sub>      | CO <sub>3</sub>       | DIC                   | Total Alkalinity      | Aragonite Saturation |
| Treatment          | Temperature  | Salinity     | L min <sup>-1</sup> | Scale        | μmol kg <sup>-1</sup> | μatm                     | μmol kg <sup>-1</sup> | μmol kg <sup>-1</sup> | μmol kg <sup>-1</sup> | μmol kg <sup>-1</sup> | state                |
| Ambient            | 14.82 ± 0.12 | 29 ± 0.03    | 496 ± 139           | 7.86 ± 0.007 | 24 ± 0.5              | 608 ± 11                 | 1842 ± 4              | 86 ± 1.4              | 1952 ± 3              | 2056 ± 1              | 1.35 ± 0.02          |
| Low                | 14.91 ± 0.12 | 29 ± 0.04    | 486 ± 153           | 7.31 ± 0.004 | 91 ± 0.7              | 2345 ± 20                | 1992 ± 1              | 26 ± 0.20             | 2108 ± 1              | 2056 ± 1              | 0.41 ± 0.003         |
| Secondary exposure |              |              |                     |              |                       |                          |                       |                       |                       |                       |                      |
|                    |              |              | Flow rate           | pH, Total    | CO <sub>2</sub>       | <i>p</i> CO <sub>2</sub> | HCO <sub>3</sub>      | CO <sub>3</sub>       | DIC                   | Total Alkalinity      | Aragonite Saturation |
| Treatment          | Temperature  | Salinity     | L min <sup>-1</sup> | Scale        | μmol kg <sup>-1</sup> | μatm                     | μmol kg <sup>-1</sup> | μmol kg <sup>-1</sup> | μmol kg <sup>-1</sup> | μmol kg <sup>-1</sup> | state                |
| Ambient            | 16.33 ± 0.22 | 28.67 ± 0.03 | 495 ± 143           | 7.93 ± 0.004 | 19 ± 0.3              | 506 ± 5                  | 1781 ± 5              | 102 ± 1.4             | 1902 ± 4              | 2033 ± 2              | 1.60 ± 0.02          |
| Low                | 16.40 ± 0.22 | 28.67 ± 0.04 | 472 ± 87            | 7.27 ± 0.007 | 95 ± 1.3              | 2551 ± 42                | 1972 ± 3              | 25 ± 0.3              | 2091 ± 3              | 2033 ± 3              | 0.39 ± 0.005         |

|                              |                                                                               | df                             | SS      | MS           | F      | P                |
|------------------------------|-------------------------------------------------------------------------------|--------------------------------|---------|--------------|--------|------------------|
| <b>Initial exposure</b>      |                                                                               | <i>Two-way ANOVA</i>           |         |              |        |                  |
| Respiration rate             | time                                                                          | 3                              | 0.0323  | 0.011        | 0.822  | 0.485            |
|                              | $p\text{ CO}_2$                                                               | 1                              | 0.0983  | 0.098        | 7.512  | <b>0.007</b>     |
|                              | $p\text{ CO}_2 \times \text{time}$                                            | 3                              | 0.0475  | 0.016        | 1.210  | 0.311            |
| Shell length                 | time                                                                          | 3                              | 4.250   | 1.415        | 3.392  | <b>0.018</b>     |
|                              | $p\text{ CO}_2$                                                               | 1                              | 0       | 0.0005       | 0.0012 | 0.973            |
|                              | $p\text{ CO}_2 \times \text{time}$                                            | 3                              | 0.170   | 0.058        | 0.138  | 0.937            |
| <b>Ambient common garden</b> |                                                                               | <i>Welch Two Sample t-test</i> |         |              |        |                  |
| Respiration rate             | $p\text{ CO}_2$                                                               | 19.833                         | 2.673   | <b>0.015</b> | -      | -                |
| Shell length                 | $p\text{ CO}_2$                                                               | 1.146                          | 236.680 | 0.253        | -      | -                |
| <b>Secondary exposure</b>    |                                                                               | <i>Three-way ANOVA</i>         |         |              |        |                  |
| Respiration rate             | time                                                                          | 2                              | 0.068   | 0.034        | 3.137  | 0.051            |
|                              | $p\text{ CO}_2$ initial                                                       | 1                              | 0.021   | 0.021        | 1.916  | 0.171            |
|                              | $p\text{ CO}_2$ secondary                                                     | 1                              | 0.032   | 0.032        | 2.926  | 0.092            |
|                              | $p\text{ CO}_2$ initial $\times p\text{ CO}_2$ secondary                      | 1                              | 0.023   | 0.023        | 2.080  | 0.154            |
|                              | $p\text{ CO}_2$ initial $\times \text{time}$                                  | 2                              | 0.016   | 0.008        | 0.724  | 0.489            |
|                              | $p\text{ CO}_2$ secondary $\times \text{time}$                                | 2                              | 0.002   | 0.001        | 0.103  | 0.903            |
|                              | $p\text{ CO}_2$ initial $\times p\text{ CO}_2$ secondary $\times \text{time}$ | 2                              | 0.035   | 0.017        | 1.608  | 0.209            |
| Shell length                 | time                                                                          | 2                              | 0.190   | 0.095        | 0.152  | 0.859            |
|                              | $p\text{ CO}_2$ initial                                                       | 1                              | 9.910   | 9.910        | 15.821 | <b>&lt;0.001</b> |
|                              | $p\text{ CO}_2$ secondary                                                     | 1                              | 6.210   | 6.212        | 9.917  | <b>0.002</b>     |
|                              | $p\text{ CO}_2$ initial $\times p\text{ CO}_2$ secondary                      | 1                              | 0.060   | 0.063        | 0.100  | 0.752            |
|                              | $p\text{ CO}_2$ initial $\times \text{time}$                                  | 2                              | 0       | 0.001        | 0.002  | 0.998            |
|                              | $p\text{ CO}_2$ secondary $\times \text{time}$                                | 2                              | 0.460   | 0.231        | 0.368  | 0.692            |
|                              | $p\text{ CO}_2$ initial $\times p\text{ CO}_2$ secondary $\times \text{time}$ | 2                              | 0.100   | 0.048        | 0.076  | 0.927            |
| <b>157 days post</b>         |                                                                               | <i>Two-way ANOVA</i>           |         |              |        |                  |
| Respiration rate             | $p\text{ CO}_2$ initial                                                       | 1                              | 0.003   | 0.002        | 0.011  | 0.919            |
|                              | $p\text{ CO}_2$ secondary                                                     | 1                              | 3.037   | 3.037        | 13.008 | <b>0.001</b>     |
|                              | $p\text{ CO}_2$ initial $\times p\text{ CO}_2$ secondary                      | 1                              | 0.050   | 0.050        | 0.212  | 0.648            |
| Shell length                 | $p\text{ CO}_2$ initial                                                       | 1                              | 10.600  | 10.597       | 5.228  | <b>0.023</b>     |
|                              | $p\text{ CO}_2$ secondary                                                     | 1                              | 0.210   | 0.214        | 0.105  | 0.746            |
|                              | $p\text{ CO}_2$ initial $\times p\text{ CO}_2$ secondary                      | 1                              | 3.510   | 3.507        | 1.730  | 0.190            |

Significant P-values (< 0.05) are bolded.

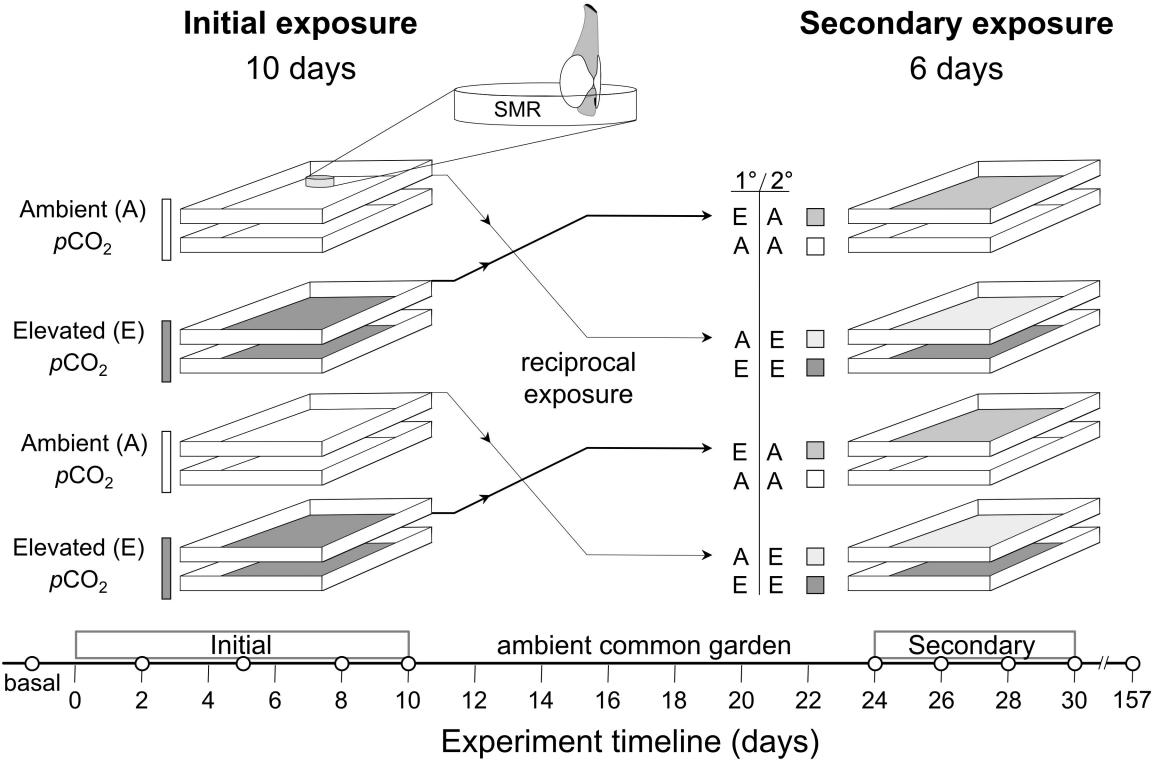

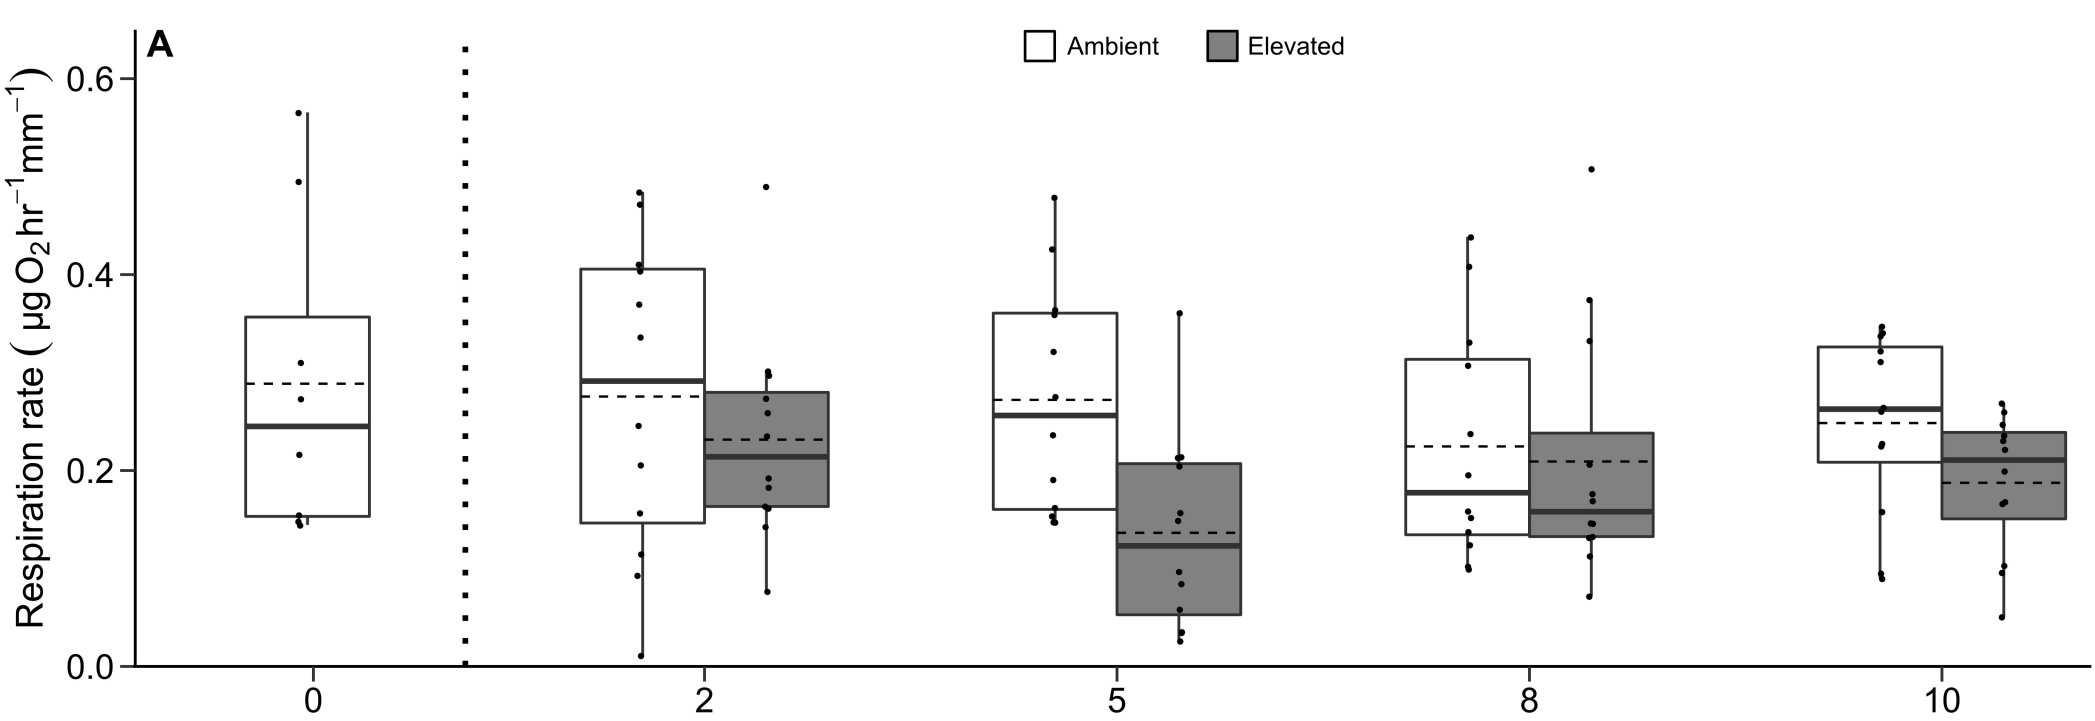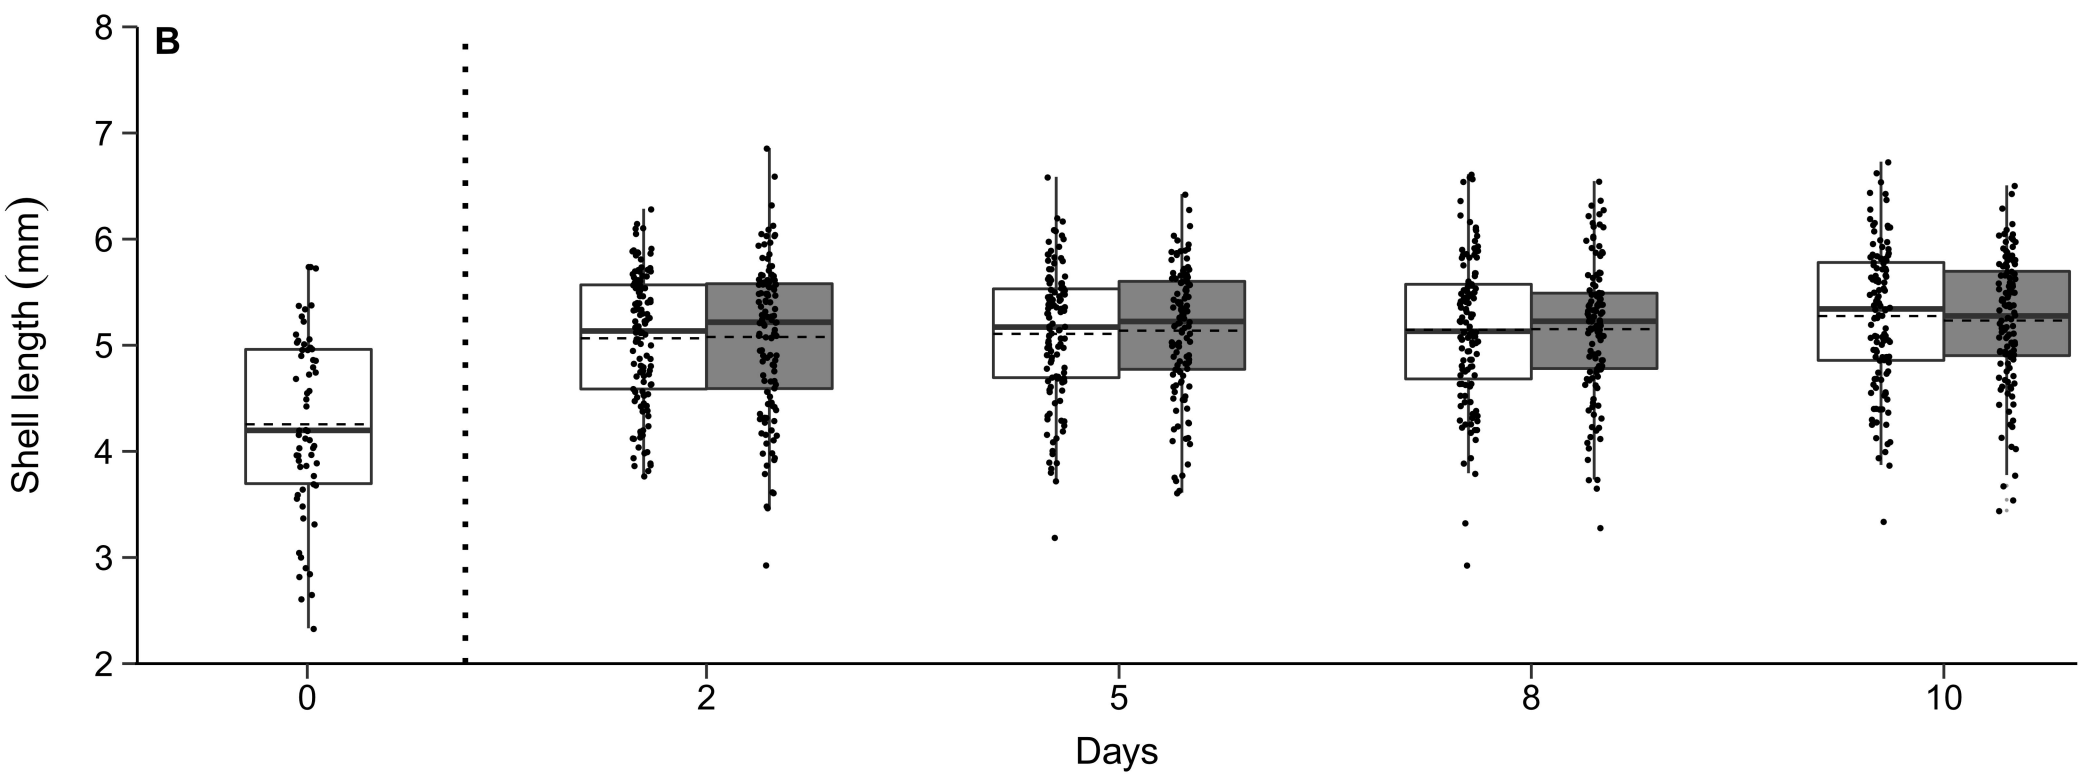

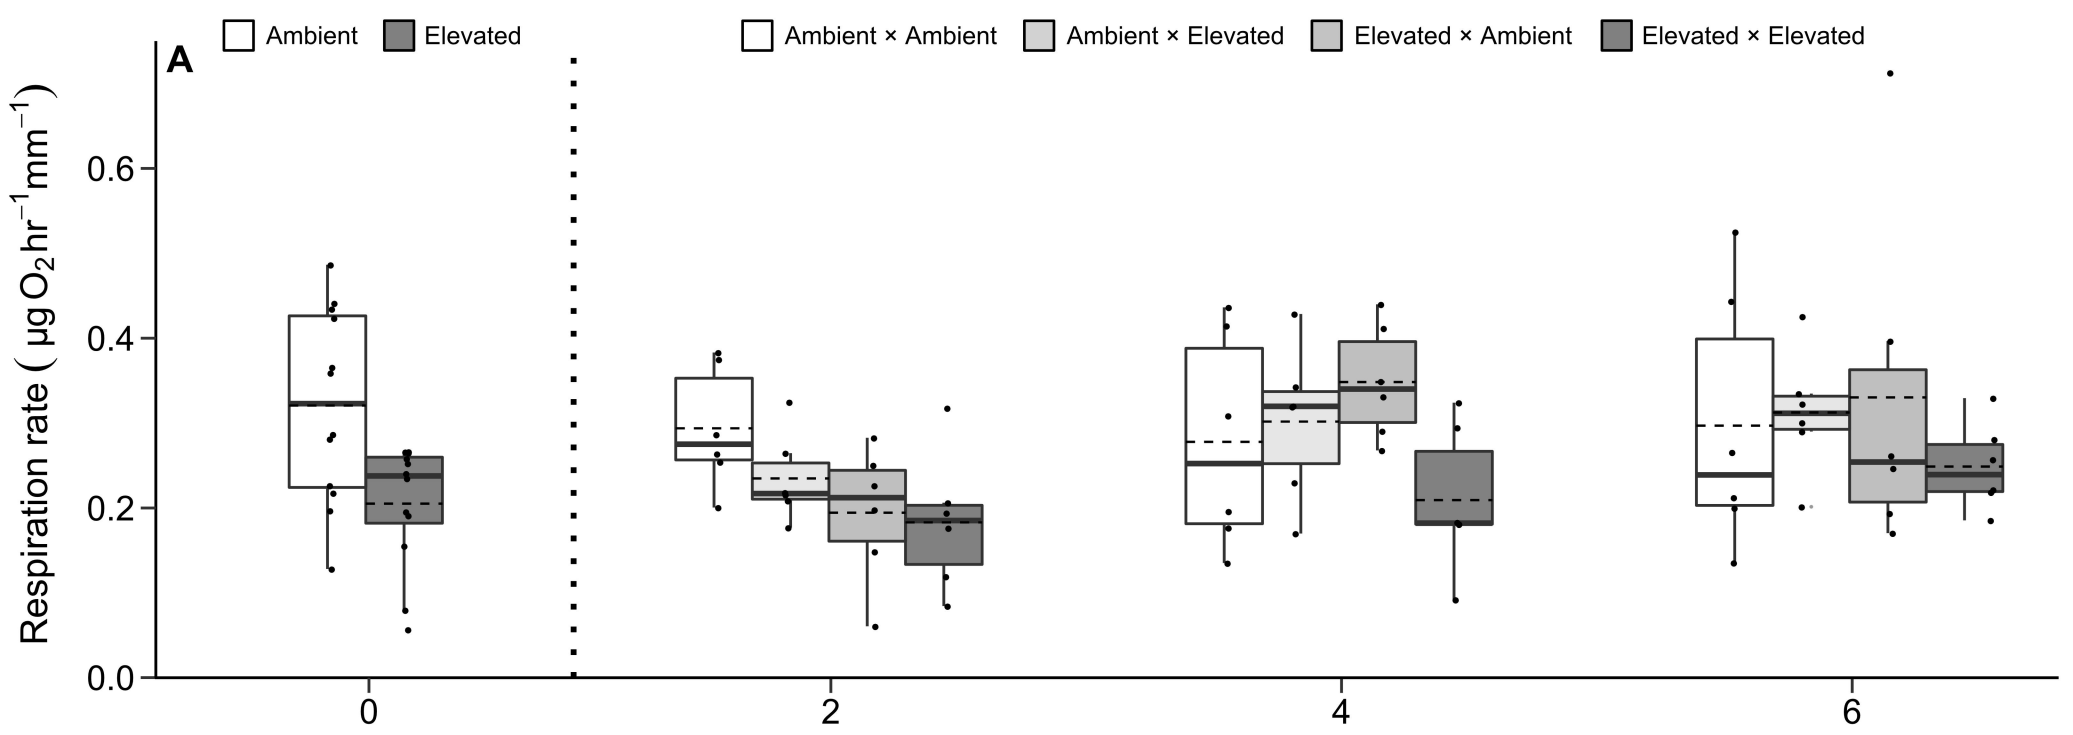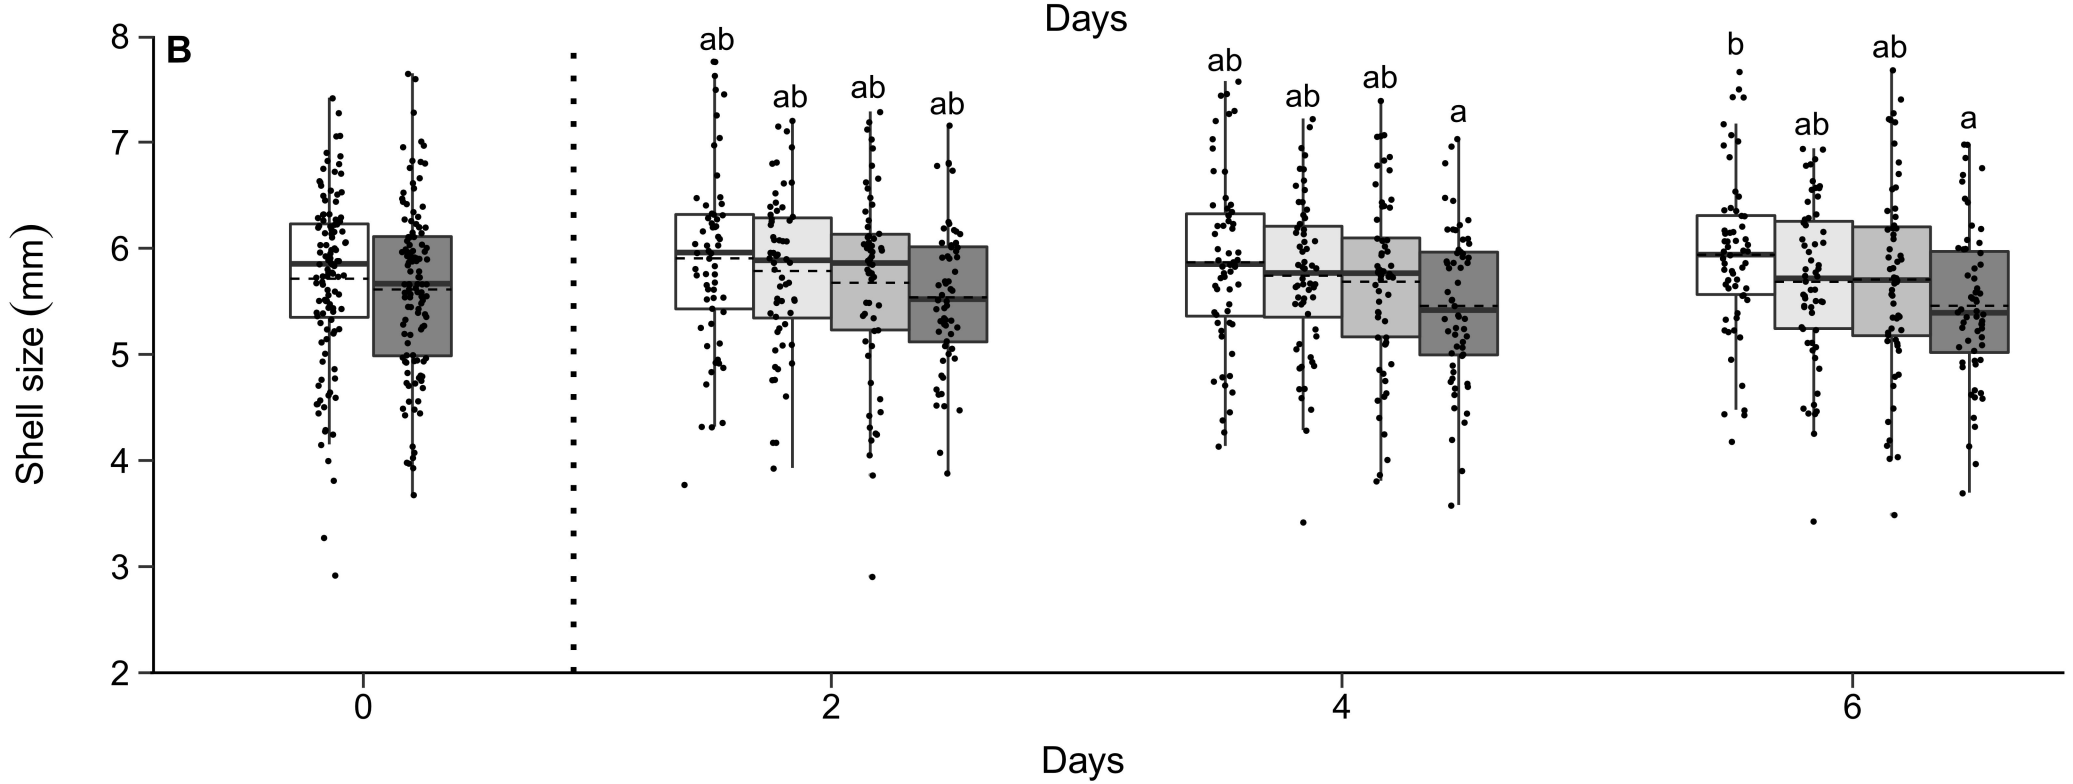



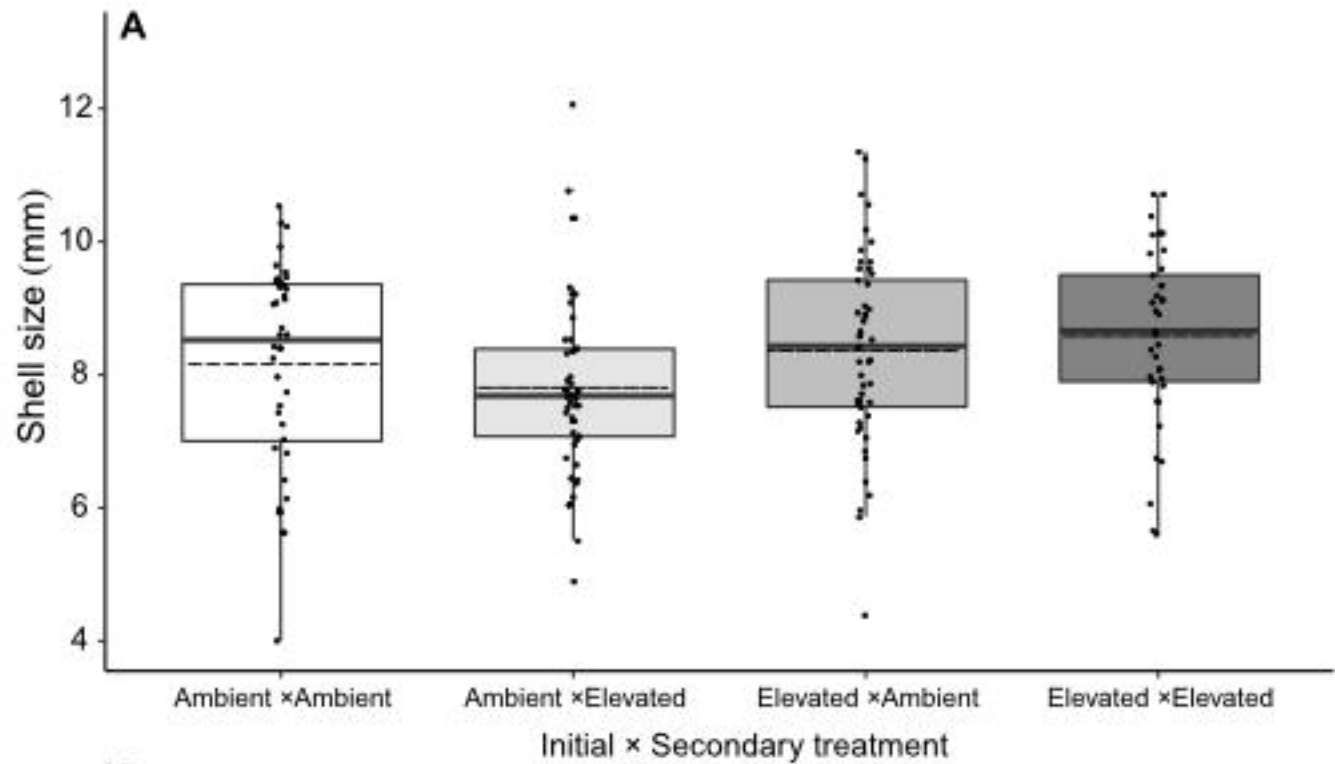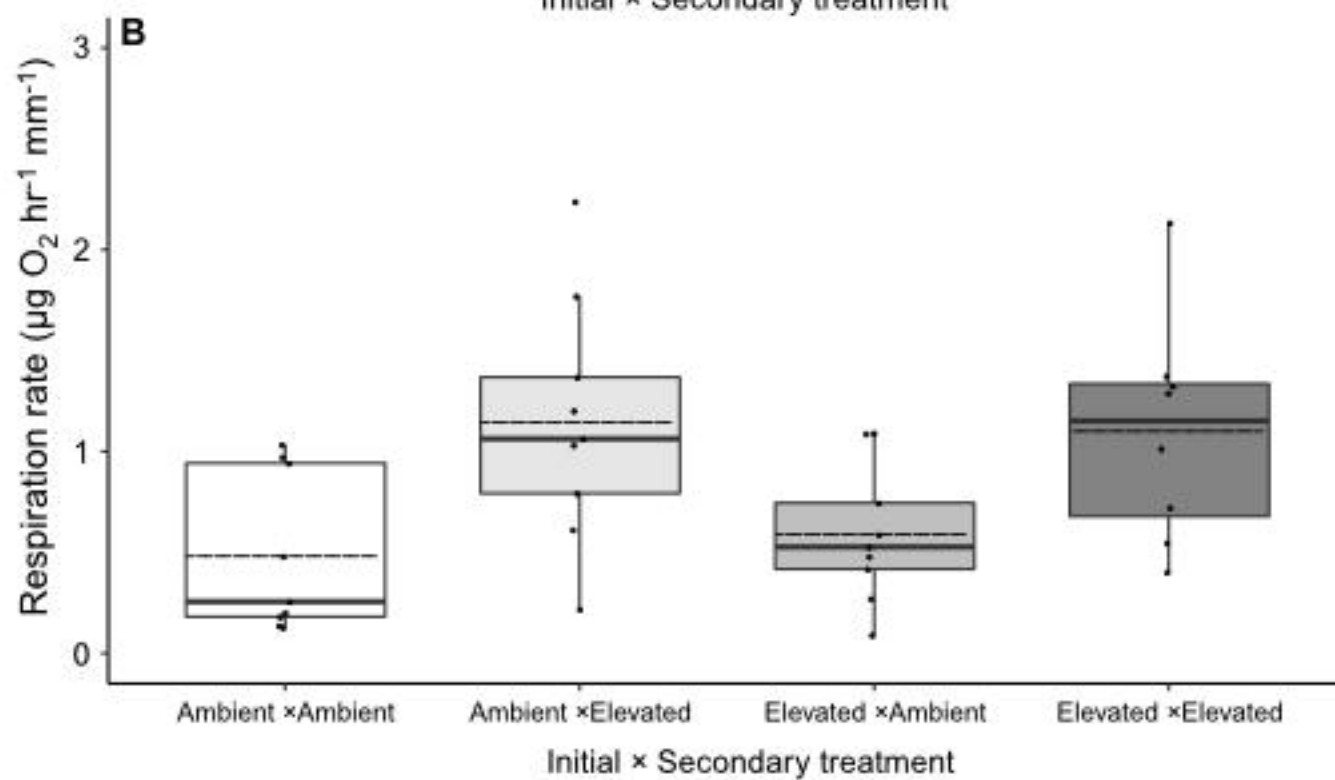

Source: https://www.biorxiv.org/content/10.1101/689745v1.full.pdf
